# Supplementary material
Source: Frontiers journal article supplement (https://www.frontiersin.org/articles/413513)
Supplement: Data_Sheet_2.PDF [file Data_Sheet_2.PDF]

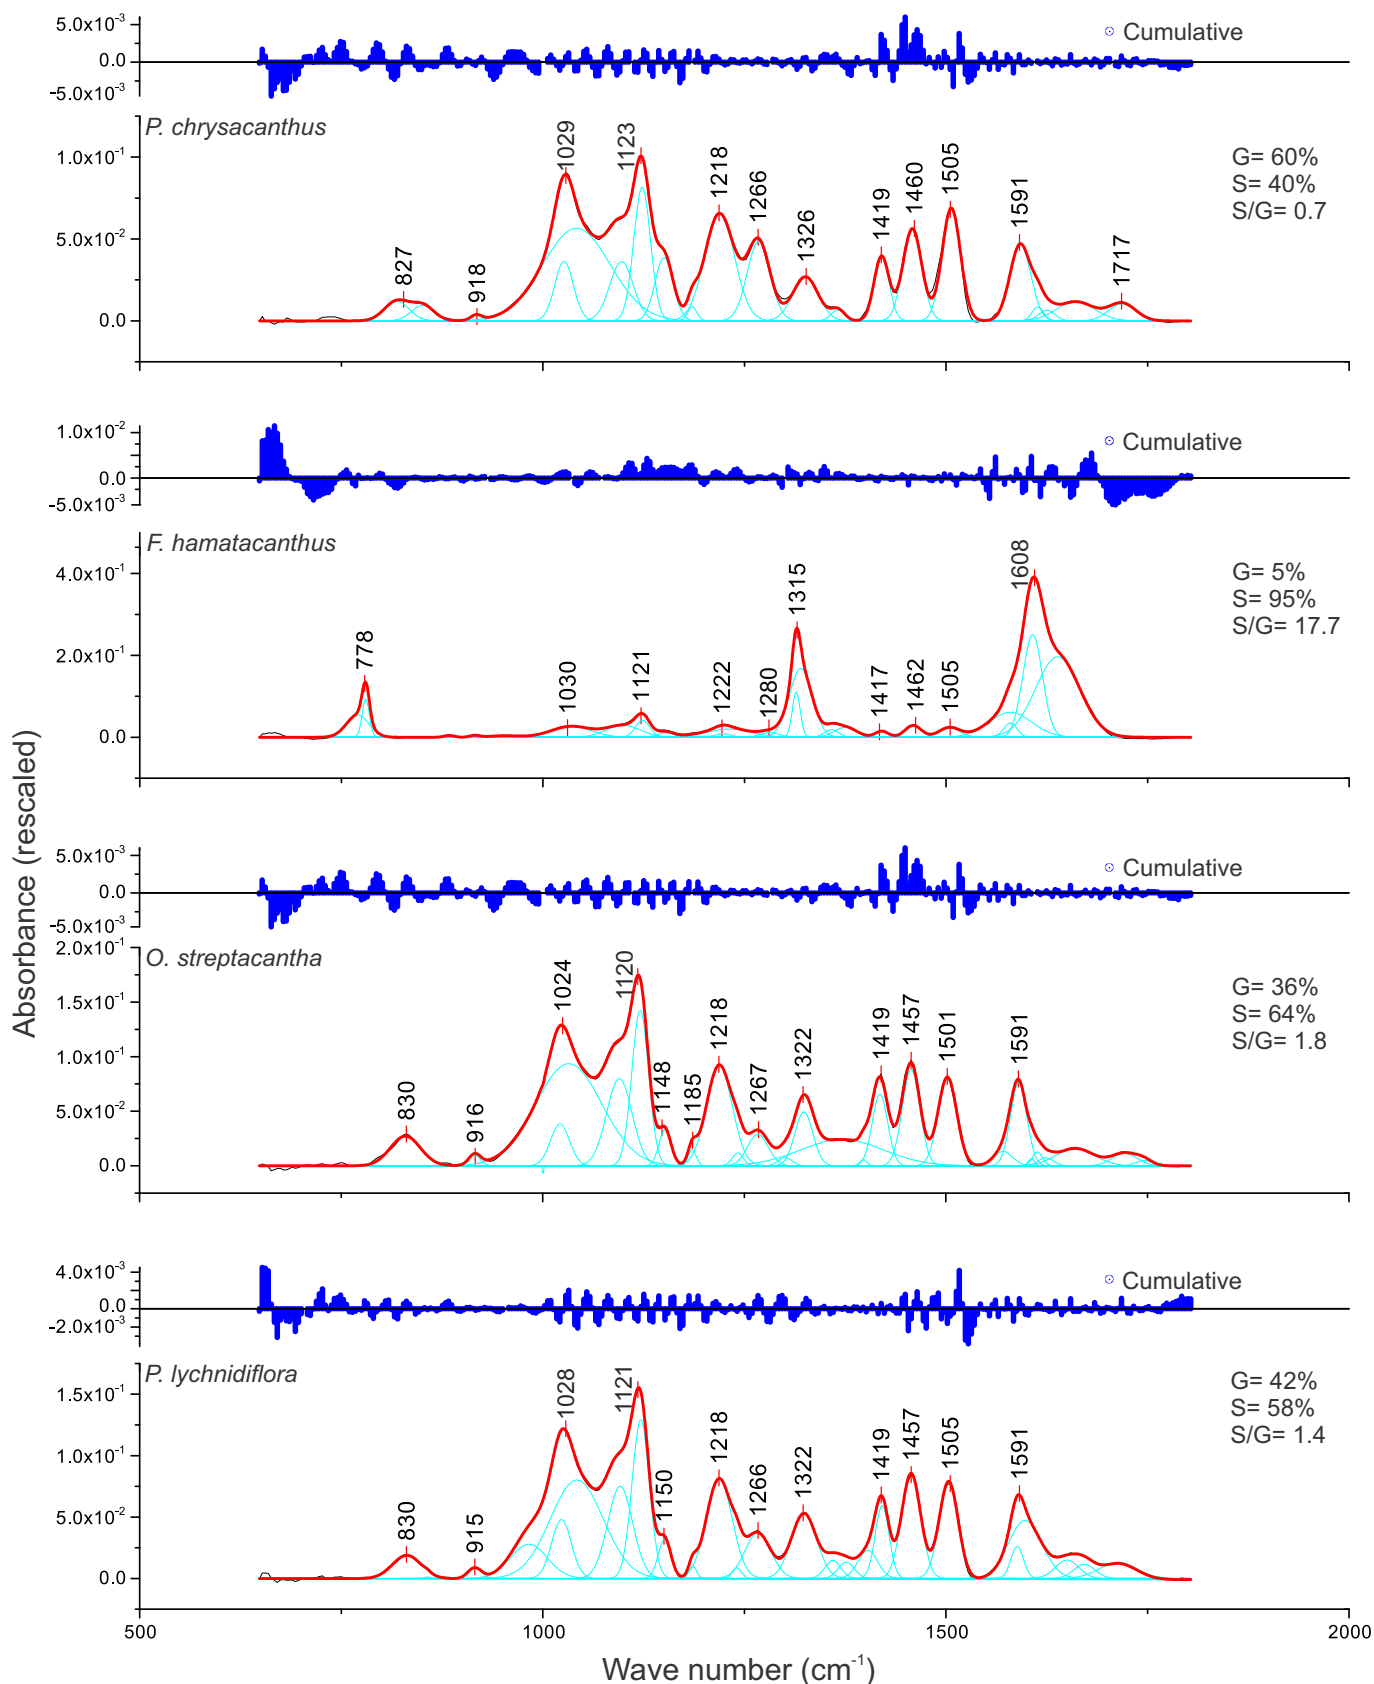

**Figure S2.** ATR-FTIR spectra deconvolution used to calculate relative abundances of G and S units, as well as the S/G ratio. The sum of the squares of the residual error for each spectrum was always in the range of  $\pm 5.0 \times 10^{-3}$ , the determination coefficients were never less than 0.98.
